# Supplementary material
Source: MDPI journal article supplement (https://www.mdpi.com/2076-0760/6/4/131)
Supplement: s1 [file s1]

**TABLE 1: RELIGIOUSITY (Percent)**

|                           | Respondents | Pew 2007 | Pew 2011 |
|---------------------------|-------------|----------|----------|
| <b>Prayer</b>             |             |          |          |
| Five Daily                | 57.4        | 41       | 40       |
| Fewer Daily               | 8.5         | 20       | 20       |
| Less Often                | 29.7        | 26       | 29       |
| Never                     | 4.2         | 12       | 10       |
| <b>Service Attendance</b> |             |          |          |
| Weekly                    | 38.3        | 34       | 47       |
| Monthly                   | 29.8        | 29       | 41       |
| Seldom/Never              | 31.3        | 37       | 11       |

Sources:

Pew Forum on Religion in Public Life (2007): Prayer is for all US Muslims (p. 25).

Service Attendance is for native born not African American (p. 24). The Pew category

“less often” is reported here as monthly attendance.

Pew Forum on Religion in Public Life (2011): Prayer (p.25) and Service Attendance

(p.26) is for those who are native born not African American.
